# Supplementary material
Source: PubMed Central journal article supplement (PMC3754755)
Supplement: JB.00711-13_zjb999092793so1.pdf [file JB.00711-13_zjb999092793so1.pdf]

Supplementary Table 1: Oligonucleotides used in the study:

| Oligo Name | Sequence (5' to 3')                               | Description                               |
|------------|---------------------------------------------------|-------------------------------------------|
| ORG 210    | GGTACCGCCTTTAAAATCCATTTATTTGGATTCTAAGGG           | <i>tcsR</i> upstream (Forward with KpnI)  |
| ORG 211    | GAGCTC TACTCATATTATGCACTCCTTTATGG                 | <i>tcsR</i> upstream (Reverse with SacI)  |
| ORG 208    | GAGCTCATATAAGAGAGGATGATTTTATGC                    | <i>tcdR</i> ORF (Forward with SacI)       |
| ORG 209    | GGATCCTTAATGATGATGATGATGATGCAAGTTAAAAT<br>AATTTTC | <i>tcdR</i> -ORF (Reverse with BamHI)     |
| ORG 203    | GAGCTCACCATAAAGGAGTGCATAATTATGA                   | <i>tcsR</i> ORF (Forward with SacI)       |
| ORG 204    | GGATCCTTAATGATGATGATGATGATGATTTATTAATTT<br>TTTTAG | <i>tcsR</i> ORF (Reverse with BamHI)      |
| ORG 194    | GGAATGGTACCTCACTTCCTCCATGACCTAA                   | <i>tcsL</i> upstream (Forward with KpnI)  |
| ORG 195    | GGAATGAGCTCTAAAATTCCCCCTTATATAACAT                | <i>tcsL</i> upstream (Reverse with SacI)  |
| ORG 197    | ACGGCTCAACCGTAGTAAGC                              | 16srRNA (Q-RT PCR-Forward)                |
| ORG 198    | TCTACGCATTTACCGCTAC                               | 16srRNA (Q-RT PCR-Reverse)                |
| ORG 192    | GGGATGTTTGAGGGCAATAA                              | <i>tcsE</i> (Q-PCR RT- Forward)           |
| ORG 193    | TTCCTCCATTGATTCCAAAAC                             | <i>tcsE</i> (Q-PCR RT- Reverse)           |
| ORG 190    | CATGGACTAAGGGAATCTGAAA                            | <i>tcsR</i> (Q-PCR RT- Forward)           |
| ORG 191    | TTTTCCAAAGCTCTTAAATGTGTTT                         | <i>tcsR</i> (Q-PCR RT- Reverse)           |
| ORG 186    | CAGCAGCTTCAACTGCAATC                              | <i>tcsL</i> (Q-PCR RT-Forward)            |
| ORG 187    | CTGAAATTCCTGCCAAAGGA                              | <i>tcsL</i> (Q- PCR RT-Reverse)           |
| ORG 310    | TTTAGCTGCAGCATCTGATTT                             | <i>tcsH</i> (Q-PCR RT- Forward)           |
| ORG 311    | TAAATCTGGTTGTATCCCTGGC                            | <i>tcsH</i> (Q- PCR RT – Reverse)         |
| ORG 17     | GGTCGGTACCATGGACCCAAGAGATGCTGGTGCTTCT             | <i>erm B</i> (Forward)                    |
| ORG 18     | GCTAGAGCTCGAACGCGTGCGACTCATAGAATTATTTCT<br>CT     | <i>erm B</i> (Reverse)                    |
| ORG 292    | GGTACCTTAAATAAATTTCAAAGAAATAGTTGC                 | <i>tcsH</i> upstream ((Forward with KpnI) |
| ORG 293    | GAGCTCAAGACCCTCCTAATATTATTATTTTGGGC               | <i>tcsH</i> upstream (Reverse with SacI)  |
| ORG 294    | GGTACCGGTATAATGAAAACAGGGCTTATCATTG                | <i>tcsE</i> upstream (Forward with KpnI)  |
| ORG 295    | GAGCTCAATGCCTCCTAGTTTTGTAATTAATAAAT               | <i>tcsE</i> upstream (Reverse with SacI)  |

## Supplementary Table 2: ATCC 9714 toxin locus

| Locus tag | Length<br>(aa) | Predicted<br>product                         | Hit description                                                                                                        | E-value | % identity    | Conserved domains                        |
|-----------|----------------|----------------------------------------------|------------------------------------------------------------------------------------------------------------------------|---------|---------------|------------------------------------------|
| H477_0243 | 149            | Leucine Rich repeat family protein           | S4 domain protein [ <i>Clostridium perfringens</i> D str. JGS1721 <a href="#">ZP_02954940.1</a> ]                      | 93-27   | 49%<br>71/145 | No putative conserved domains            |
| H477_0244 | 126            | Hypothetical protein                         | No homology found                                                                                                      |         |               | No putative conserved domains            |
| H477_0245 | 126            | Hypothetical protein                         | No homology found                                                                                                      |         |               | No putative conserved domains            |
| H477_0246 | 206            | RNA polymerase sigma factor, sigma-70 family | RNA polymerase sigma factor SigV [ <i>Clostridium</i> sp. D5] <a href="#">ZP_08131089.1</a>                            | 33-24   | 33%<br>61/187 | Sigma70_r2, r4 superfamily               |
| H477_0247 | 216            | EAL domain protein                           | Cyclic diguanylate phosphodiesterase (EAL) domain protein [ <i>Clostridium</i> sp. HGF2] <a href="#">ZP_07832144.1</a> | 2e-18   | 27%<br>60/221 | EAL domain, bacterial signalling protein |
| H477_0248 | 252            | RNA polymerase sigma factor, sigma-70 family | RNA polymerase sigma-70 factor [ <i>Clostridium perfringens</i> D str. JGS1721] <a href="#">ZP_02953213.1</a>          | 2e-22   | 38%<br>65/173 | Sigma70_r2 , Sigma 70 region 4           |
| H477_0249 | 59             | Hypothetical protein                         | No homology found                                                                                                      |         |               | No putative conserved domains            |
| H477_0250 | 174            | Hypothetical protein                         | Sigma-70 family RNA polymerase sigma factor [ <i>Stomatobaculum longum</i> ] <a href="#">ZP_09521451.1</a>             | 3e-07   | 28%<br>32/115 | No putative conserved domain             |
| H477_0251 | 158            | Bacterial Ig-like domain family protein"     | Bacterial group 3 Ig-like protein [ <i>Clostridium celatum</i> DSM 1785] <a href="#">ZP_19299437.1</a>                 | 8e-08   | 56%<br>31/55  | Bacterial Ig like domain group III       |

|           |     |                                                  |                                                                                                            |        |     |                  |                                                 |
|-----------|-----|--------------------------------------------------|------------------------------------------------------------------------------------------------------------|--------|-----|------------------|-------------------------------------------------|
| H477_0252 | 316 | Actino bacterial surface-anchored domain protein | Bacterial group 3 Ig-like protein [ <i>Clostridium celatum</i> DSM 1785] <a href="#">ZP_19299437.1</a>     | 2e-69  | 48% | Big_3<br>153/325 | Bacterial Ig like domain group III              |
| H477_0253 | 296 | Bacterial Ig-like domain family protein          | Chitinase B [ <i>Clostridium paraputrificum</i> ] <a href="#">BAA23796.1</a>                               | 7e-16  | 46% | 65/141           | No putative conserved domain                    |
| H477_0254 | 218 | Hypothetical protein                             | No homology found                                                                                          |        |     |                  | No putative conserved domain                    |
| H477_0255 | 57  | Transcriptional regulator family protein         | Rrf2 family transcriptional regulator [ <i>Clostridium difficile</i> 630] <a href="#">YP_001089272.1</a>   | 0.030  | 45% | 21/47            | RrF2 superfamily transcriptional regulator      |
| H477_0256 | 93  | Hypothetical protein                             | Hypothetical protein phiCD27_gp59 [ <i>Clostridium</i> phage phiCD27] <a href="#">YP_002290935.1</a>       | 0.63   | 64% | 16/25            | No putative conserved domain                    |
| H477_0257 | 65  | Antidote-toxin recognition MazE family protein   | Hypothetical protein CdifQCD_20326 [ <i>Clostridium difficile</i> QCD-37x79] <a href="#">ZP_05399442.1</a> | 6e-11  | 42% | 25/60            | No putative conserved domain                    |
| H477_0258 | 46  | Hypothetical protein                             | No homology found                                                                                          |        |     |                  | No putative conserved domain                    |
| H477_0259 | 278 | ParB-like nuclease domain protein                | ParB protein [ <i>Clostridium perfringens</i> C str. JGS1495] <a href="#">ZP_02865546.1</a>                | 2e-105 | 69% | 164/237          | ParBc superfamily                               |
| H477_0260 | 69  | Soj domain protein                               | Soj protein [ <i>Clostridium perfringens</i> str. 13] <a href="#">NP_149993.1</a>                          | 4e-15  | 54% | 37/68            | Soj, mind_arch, flhG domain                     |
| H477_0261 | 146 | CobQ/CobB/MinD /ParA nucleotide binding domain   | Chromosome partitioning related protein [ <i>Clostridium perfringens</i> ] <a href="#">YP_209675.1</a>     | 5e-73  | 76% | 105/139          | Plasmid partitioning protein, ParA, superfamily |

|           |      |                                       |                                                                                                            |       |     |                                          |
|-----------|------|---------------------------------------|------------------------------------------------------------------------------------------------------------|-------|-----|------------------------------------------|
| H477_0262 | 220  | Cell wall hydrolase/autolysin         | N-acetylmuramoyl-L-alanine amidase [ <i>Clostridium</i> sp. D5] <a href="#">ZP_08128126.1</a>              | 3e-25 | 37% | N-Acetylmuramoyl-L-alanine amidase I, II |
| H477_0263 | 2364 | Cytotoxin L (TcsL)                    | <i>C. sordellii</i> -cytotoxin L <a href="#">CAA57959.1</a>                                                | 0.0   | 99% | N terminal Glycosyltransferase domain    |
| H477_0264 | 141  | Holin (TcsE)                          | TcdE protein [ <i>Clostridium difficile</i> ] <a href="#">CAC79642.1</a>                                   | 2e-66 | 73% | Phage Holin                              |
| H477_0265 | 60   | Haemorrhagic toxin (TcsH (Truncated)) | Truncated toxin A [ <i>Clostridium difficile</i> ] <a href="#">AAC08437.1</a>                              | 3e-08 | 93% | TcdA_TcdB                                |
| H477_0266 | 142  | Haemorrhagic toxin (TcsH (Truncated)) | Truncated toxin A [ <i>Clostridium difficile</i> ] <a href="#">AAC08437.1</a>                              | 1e-66 | 77% | Glycosyltransferase domain               |
| H477_0267 | 170  | Sigma factor (TcsR) ( <i>tcsR</i> )   | TcdR [ <i>Clostridium difficile</i> ] <a href="#">ABI93806.1</a>                                           | 2e-15 | 35% | Sigma 70- region 4                       |
| H477_0268 | 87   | Hypothetical protein                  | Conserved hypothetical protein [ <i>Beggiatoa</i> sp. PS] <a href="#">ZP_01999532.1</a>                    | 0.36  | 34% | No putative conserved domain             |
| H477_0269 | 60   | Hypothetical protein                  | Hypothetical protein LsueK3_08561 [ <i>Lactobacillus suebicus</i> KCTC 3549] <a href="#">ZP_09451275.1</a> | 2.1   | 43% | No putative conserved domain             |
| H477_0270 | 407  | Initiator family Replication protein  | RepB protein [ <i>Clostridium difficile</i> 002-P50-2011] <a href="#">ZP_17071833.1</a>                    | 7e-56 | 36% | Rep_3 superfamily, Replication protein   |
| H477_0271 | 63   | Hypothetical protein                  | No homology found                                                                                          |       |     | No putative conserved domain             |

|           |     |                                                      |                                                                                                                                   |       |        |                                                                                     |
|-----------|-----|------------------------------------------------------|-----------------------------------------------------------------------------------------------------------------------------------|-------|--------|-------------------------------------------------------------------------------------|
| H477_0272 | 126 | Hypothetical                                         | No homology found                                                                                                                 |       |        |                                                                                     |
| H477_0273 | 370 | Hypothetical protein                                 | Hypothetical protein CBCST_p6CBCSt0005 [ <i>Clostridium botulinum</i> ] <a href="#">ZP_11680199.1</a>                             | 2e-09 | 48%    | No putative conserved domain                                                        |
| H477_0274 | 135 | Hypothetical protein                                 | No homology found                                                                                                                 |       |        | DNA binding helix turn helix motif                                                  |
| H477_0275 | 369 | Recombination protein                                | Recombinase A [ <i>Clostridium difficile</i> 630] <a href="#">YP_001087824.1</a>                                                  | 0.0   | 80%    | Recombination protein                                                               |
| H477_0276 | 48  | Hypothetical protein                                 | No homology found                                                                                                                 |       |        | No putative conserved domain                                                        |
| H477_0277 | 100 | Hypothetical protein                                 | No homology found                                                                                                                 |       |        | No putative conserved domain                                                        |
| H477_0278 | 325 | Transcriptional regulator                            | DNA binding helix-turn-helix protein [ <i>Clostridium difficile</i> 050-P50-2011] <a href="#">ZP_17073318.1</a>                   | 2e-09 | 49%    | DNA binding helix turn helix protein, transcription repressor and regulator protein |
| H477_0279 | 162 | Hypothetical protein                                 | Conserved hypothetical protein [ <i>Clostridium perfringens</i> B str ATCC 3626 <a href="#">ZP_02636631.1</a> ]                   | 1e-05 | 29%    | No putative conserved domain                                                        |
| H477_0280 | 341 | Cysteine rich secretory family Extracellular protein | SCP-like protein [ <i>Clostridium difficile</i> 002-P50-2011] >ref  <a href="#">ZP_17073080.1</a>   <a href="#">ZP_17069969.1</a> | 3e-06 | 28%    | SCP-like Extracellular protein domain, Cysteine-rich secretory protein              |
| H477_0281 | 79  | Hypothetical protein                                 | No homology found                                                                                                                 |       |        | Glycoside hydrolase like superfamily                                                |
| H477_0282 | 177 | Hypothetical protein                                 | Conserved hypothetical protein [ <i>Clostridium perfringens</i> E str.                                                            | 1e-10 | 37%    | No putative conserved domain                                                        |
|           |     |                                                      |                                                                                                                                   |       | 46/125 |                                                                                     |

JGS1987 ZP\_02633035.1

|           |      |                                  |                                                                                                              |       |                 |                                                                                                                                   |
|-----------|------|----------------------------------|--------------------------------------------------------------------------------------------------------------|-------|-----------------|-----------------------------------------------------------------------------------------------------------------------------------|
| H477_0283 | 144  | Hypothetical protein             | No significant Homology                                                                                      |       |                 | No putative conserved domain                                                                                                      |
| H477_0284 | 75   | Regulatory protein               | Phage regulatory protein<br>[ <i>Clostridium difficile</i> ATCC 43255]<br><u>ZP_05349371.1</u>               | 4e-04 | 38%<br>24/64    | HTH_XRE superfamily,<br>HipB                                                                                                      |
| H477_0285 | 76   | Regulatory protein               | Transcriptional Regulator<br>[ <i>Clostridium perfringens</i> D str.<br>JGS1721] <u>ZP_02952728.1</u>        | 2.3   | 31%<br>21/68    | No putative conserved domain                                                                                                      |
| H477_0286 | 1354 | Collagen adhesion protein        | Collagen adhesin [ <i>Clostridium perfringens</i> str. 13] <u>NP_150050.1</u>                                | 0     | 48%<br>496/1039 | Cna peptidase protein                                                                                                             |
| H477_0287 | 107  | Hypothetical protein             | No homology found                                                                                            |       |                 | No putative conserved domain                                                                                                      |
| H477_0288 | 120  | Hypothetical protein             | Hypothetical protein AC3_A0045<br>[ <i>Clostridium perfringens</i> E str.<br>JGS1987] <u>ZP_02632952.1</u>   | 2e-06 | 34%<br>30/89    | No putative conserved domain                                                                                                      |
| H477_0289 | 84   | Hypothetical protein             | Hypothetical protein Cspa_c57090<br>[ <i>Clostridium saccharoperbutylacetonicum</i> N1-4(HMT)] gb AGF59434.1 | 93-06 | 35%<br>29/83    | No putative conserved domain                                                                                                      |
| H477_0290 | 213  | Dna Topoisomerase family protein | putative DNA topoisomerase<br>[ <i>Clostridium difficile</i> QCD-97b34] <u>ZP_05385472.1</u>                 | 6e-48 | 45%<br>96/213   | Putative nucleotide, metal binding protein, TOPRIM_TopoIA_TopoII ITOP1Ac superfamily, topoisomerase primase, topoisomerase I, III |
| H477_0291 | 276  | Dna Topoisomerase                | DNA topoisomerase type IA<br>[ <i>Clostridium difficile</i> 630]                                             | 2e-29 | 33%             | TOP1Ac, DNA topoisomerase 1, III                                                                                                  |

|           |     |                                             |                                                                                                                           |        |         |                                                                         |
|-----------|-----|---------------------------------------------|---------------------------------------------------------------------------------------------------------------------------|--------|---------|-------------------------------------------------------------------------|
|           |     | family protein                              | <a href="#">YP_001088916.1</a>                                                                                            |        | 89/266  |                                                                         |
| H477_0292 | 132 | DNA topoisomerase                           | DNA topoisomerase [ <i>Clostridium difficile</i> QCD-23m63] <a href="#">ZP_05400436.1</a>                                 | 4e-17  | 40%     | PRK08173, DNA topoisomerase III                                         |
|           |     |                                             |                                                                                                                           |        | 46/114  |                                                                         |
| H477_0293 | 161 | Hypothetical protein                        | Conserved hypothetical protein [ <i>Clostridium perfringens</i> D str. JGS1721] <a href="#">ZP_02954621.1</a>             | 4e-08  | 26%     | No putative conserved domain                                            |
|           |     |                                             |                                                                                                                           |        | 37/144  |                                                                         |
| H477_0294 | 54  | Hypothetical protein                        | No homology found                                                                                                         |        |         | No putative conserved domain                                            |
| H477_0295 | 76  | Putative membrane protein                   | Conserved hypothetical protein [ <i>Clostridium perfringens</i> D str. JGS1721] <a href="#">ZP_02952703.1</a>             | 2E-12  | 50%     | No putative conserved domain                                            |
|           |     |                                             |                                                                                                                           |        | 38/76   |                                                                         |
| H477_0296 | 94  | Hypothetical protein                        | No Homology detected                                                                                                      |        |         | No putative conserved domain                                            |
| H477_0297 | 339 | type IV secretory system<br>Conjugative DNA | Type IV secretory pathway, VirD4 component [ <i>Clostridium perfringens</i> D str. JGS1721] <a href="#">ZP_02952628.1</a> | 2e-113 | 51%     | Type IV secretory pathway, VirD4 components                             |
|           |     |                                             |                                                                                                                           |        | 192/377 |                                                                         |
| H477_0298 | 210 | type IV secretory system<br>Conjugative DNA | Type IV secretory pathway, VirD4 component [ <i>Clostridium perfringens</i> D str. JGS1721] <a href="#">ZP_02952628.1</a> | 1e-94  | 66%     | TraG-D_C superfamily, VirD4, type IV conjugal transfer coupling protein |
|           |     |                                             |                                                                                                                           |        | 139/210 |                                                                         |
| H477_0299 | 45  | No homology found                           | No homology found                                                                                                         |        |         | No putative conserved domain                                            |
| H477_0300 | 163 | Hypothetical protein                        | Putative membrane protein [ <i>Clostridium perfringens</i> C str. JGS1495] <a href="#">ZP_02865646.1</a>                  | 4e-30  | 41%     | No putative conserved domain                                            |
|           |     |                                             |                                                                                                                           |        | 60/148  |                                                                         |
| H477_0301 | 264 | Hypothetical protein                        | Putative membrane protein [ <i>Clostridium perfringens</i> B str. ATCC                                                    | 6e-35  | 35%     | No putative conserved domain                                            |
|           |     |                                             |                                                                                                                           |        | 110/312 |                                                                         |

|           |     |                                        |                                                                                                                                                         |        |                |                                                                                           |
|-----------|-----|----------------------------------------|---------------------------------------------------------------------------------------------------------------------------------------------------------|--------|----------------|-------------------------------------------------------------------------------------------|
| H477_0301 | 264 | Hypothetical protein                   | Putative membrane protein<br>[ <i>Clostridium perfringens</i> B str. ATCC 3626] <a href="#">ZP_02636580.1</a>                                           | 6e-35  | 35%<br>110/312 | No putative conserved domain                                                              |
| H477_0302 | 80  | Hypothetical protein                   | No homology found                                                                                                                                       |        |                | No putative conserved domain                                                              |
| H477_0303 | 97  | Hypothetical protein                   | Conserved hypothetical protein<br>[ <i>Clostridium perfringens</i> B str. ATCC 3626] <a href="#">ZP_02635907.1</a>                                      | 7e-17  | 46%<br>41/89   | No putative conserved domain                                                              |
| H477_0304 | 47  | Hypothetical protein                   | No homology found                                                                                                                                       |        |                | No putative conserved domain                                                              |
| H477_0305 | 141 | Hypothetical protein                   | conserved hypothetical protein<br>[ <i>Clostridium perfringens</i> E str. JGS1987] <a href="#">ZP_02633032.1</a>                                        | 4e-29  | 42%<br>60/143  | No putative conserved domain                                                              |
| H477_0306 | 51  | Hypothetical protein                   | No homology found                                                                                                                                       |        |                | No putative conserved domain                                                              |
| H477_0307 | 328 | Hypothetical protein                   | Conserved hypothetical protein<br>[ <i>Clostridium perfringens</i> B str. ATCC 3626] <a href="#">ZP_02636571.1</a>                                      | 7e-100 | 51%<br>161/313 | ATP-binding cassette domain of multidrug resistance protein-like transporters. AAA domain |
| H477_0308 | 151 | zonular occludens toxin family protein | conserved hypothetical protein<br>[ <i>Clostridium perfringens</i> C str. JGS1495] >ref[ <a href="#">ZP_16922172.1</a><br><a href="#">ZP_02865588.1</a> | 9e-57  | 63%<br>91/148  | Zot superfamily, AAA like domain, conjugal transfer ATP binding protein                   |
| H477_0309 | 221 | Hypothetical                           | No homology found                                                                                                                                       |        |                | No putative conserved                                                                     |



### Supplementary Table 3: VPI 9048 toxin locus genes

| Locus tag | Length<br>(aa) | Predicted product                              | Hit description                                                                                                    | E-value | % identity     | Conserved domains                       |
|-----------|----------------|------------------------------------------------|--------------------------------------------------------------------------------------------------------------------|---------|----------------|-----------------------------------------|
| H476_0259 | 497            | Bacterial Ig-Like domain family protein        | <i>Enterococcus faecalis</i> TX0470, collagen binding protein; <a href="#"> ZP_07761016.1 </a>                     | 3e-08   | 24%<br>107/449 | No putative conserved domain            |
| H476_0260 | 137            | Transcriptional regulator                      | BadM/Rrf2 family transcriptional regulator [ <i>Moorella thermoacetica</i> ATCC 39073] <a href="#">YP_430929.1</a> | 8e-18   | 31%<br>42/134  | Rrf2 transcriptional regulator          |
| H476_0261 | 120            | Hypothetical protein                           | Hypothetical protein [ <i>C. difficile</i> CdifQCD-6_20123] <a href="#">ZP_05332106.1</a>                          | 0.031   | 31%<br>31/101  | GIY-YIG_C term superfamily              |
| H476_0262 | 42             | Transposase IS200 like family protein          | Transposase [ <i>Clostridium</i> sp. M62/1] <a href="#">ZP_06346833.2</a>                                          | 4e-10   | 59%<br>24/41   | Y1_Tnp superfamily                      |
| H476_0263 | 362            | Transposase, IS605 OrfB family                 | Transposase [ <i>Clostridium perfringens</i> C str. JGS1495] <a href="#">ZP_02865789.1</a>                         | 0.0     | 73%<br>267/364 | Putative transposase dna binding domain |
| H476_0264 | 65             | Antidote-toxin recognition MazE family protein | Putative PemI [ <i>Clostridium difficile</i> ATCC 43255] <a href="#">ZP_05350752.1</a>                             | 9e-06   | 37%<br>21/57   | No putative conserved domain            |
| H476_0265 | 445            | Partitioning protein                           | Partition protein [ <i>Clostridium perfringens</i> E str. JGS1987]                                                 | 8e-115  | 62%            | ParB nuclease domain                    |

|           |      |                               |                                                                                                                       |        |                  |                                                |
|-----------|------|-------------------------------|-----------------------------------------------------------------------------------------------------------------------|--------|------------------|------------------------------------------------|
|           |      |                               | <u>ZP_02630615.1</u>                                                                                                  |        | 191/310          |                                                |
| H476_0266 | 250  | Cell division protein         | Sporulation initiation inhibitor protein soj [ <i>Clostridium perfringens</i> C str. JGS1495]<br><u>ZP_02865591.1</u> | 2e-125 | 70%<br>174/250   | cobQ/CobB/MinD/ParA nucleotide binding domain  |
| H476_0267 | 44   | Hypothetical protein          | No homology found                                                                                                     |        |                  | No putative conserved domain                   |
| H476_0268 | 220  | Cell wall hydrolase/autolysin | <i>Clostridium cellulovorans</i> 743B - cell wall hydrolase<br><u>YP_003842332.1</u>                                  | 2e-28  | 36%<br>81/226    | N-Acetylmuramoyl-L-alanine amidase             |
| H476_0269 | 2364 | cytotoxin L (TcsL)            | <i>C. sordellii</i> -cytotoxin L<br><u>CAA57959.1</u>                                                                 | 0.0    | 96%<br>2272/2364 | N terminal Glycosyltransferase domain. Toxin B |
| H476_0270 | 141  | Holin (TcsE)                  | TcdE protein [ <i>Clostridium difficile</i> ] CAC79642.1                                                              | 1e-67  | 74%<br>103/141   | Toxin secretion Phage lysis Holin family       |
| H476_0271 | 2597 | Hemorrhagic toxin, TcsH       | <i>C. difficile</i> Toxin A (TcdA) QCD-66c26] <u>ZP_05270743.1</u>                                                    | 0.0    | 78%<br>2055/2618 | Glycosyltransferase domain                     |
| H476_0272 | 173  | Sigma factor (TcsR)           | TcdR [ <i>Clostridium</i> ] <i>difficile</i> ] <u>ABI93806.1</u>                                                      | 1e-14  | 34%<br>60/174    | RNA polymerase Sigma 70 family- region 4       |
| H476_0273 | 60   | Hypothetical protein          | No homology found                                                                                                     |        |                  | No putative conserved domain                   |
| H476_0274 | 407  | Replication protein           | RepB protein [ <i>Clostridium difficile</i> 002-P50-2011]                                                             | 9e-56  | 36%              | Initiator Replication family protein           |

|           |     |                           |                                                                                                                       |       |                |                                                                                     |
|-----------|-----|---------------------------|-----------------------------------------------------------------------------------------------------------------------|-------|----------------|-------------------------------------------------------------------------------------|
| H476_0274 | 407 | Replication protein       | RepB protein [ <i>Clostridium difficile</i> 002-P50-2011]<br><u>ZP_17071833.1</u>                                     | 9e-56 | 36%<br>122/340 | Initiator Replication family protein                                                |
| H476_0275 | 128 | Hypothetical protein      | conserved hypothetical protein [ <i>Clostridium difficile</i> NAP08]<br><u>ZP_06892370.1</u>                          | 0.005 | 26%<br>29/112  | Helix turn helix motif NUMOD1 domain protein                                        |
| H476_0276 | 368 | Hypothetical protein      | hypothetical protein CBCST_p6CBCSt0005 [ <i>Clostridium botulinum</i> ]<br><u>ZP_11680199.1</u>                       | 2e-09 | 48%<br>32/66   | No putative conserved domain                                                        |
| H476_0277 | 135 | Hypothetical protein      | No homology found                                                                                                     |       |                |                                                                                     |
| H476_0278 | 368 | Recombination protein     | Recombinase A [ <i>Clostridium difficile</i> 630] <u>ZP_05271345.1</u>                                                | 0.0   | 80%<br>268/336 | Protein RecA like NTPases superfamily                                               |
| H476_0279 | 48  | Hypothetical protein      | Hypothetical protein CD196_1775 [ <i>Clostridium difficile</i> CD196]<br><u>YP_003218309.1</u>                        | 0.64  | 42%<br>16/38   | No putative conserved domain                                                        |
| H476_0280 | 101 | Hypothetical protein      | No homology found                                                                                                     |       |                |                                                                                     |
| H476_0281 | 306 | Transcriptional regulator | SOS-response Transcriptional Lex A repressor [ <i>Clostridium perfringens</i> D str. JGS1721]<br><u>ZP_02952675.1</u> | 2e-22 | 31%            | DNA binding helix turn helix protein, transcription repressor and regulator protein |
| H476_0282 | 162 | Hypothetical protein      | Conserved hypothetical protein [ <i>Clostridium perfringens</i> C str.                                                | 3e-05 | 28%            | No putative conserved domain                                                        |

|           |      |                           |                                                                                                                     |       |                 |                                                                 |
|-----------|------|---------------------------|---------------------------------------------------------------------------------------------------------------------|-------|-----------------|-----------------------------------------------------------------|
| H476_0283 | 331  | Extracellular protein     | Putative calcium chelating exported protein [ <i>Clostridium difficile</i> QCD-23m63] <a href="#">ZP_05402067.1</a> | 1.2   | 26%<br>71/275   | Extracellular protein<br>Cysteine rich secretory family protein |
| H476_0284 | 44   | Hypothetical protein      | No homology found                                                                                                   |       |                 | No putative conserved domain                                    |
| H476_0285 | 188  | Resolvase                 | Resolvase domain-containing protein [ <i>Clostridium difficile</i> QCD-76w55] <a href="#">ZP_05358063.1</a>         | 2e-93 | 90%<br>132/146  | Resolvase N terminal domain protein                             |
| H476_0286 | 387  | Transposase               | IS605 family transposase OrfB [ <i>Clostridium difficile</i> B11] <a href="#">YP_006197023.1</a>                    | 0.0   | 87%<br>335/387  | Putative Transposase family protein                             |
| H476_0287 | 75   | Regulatory protein        | Putative phage regulator [ <i>Clostridium difficile</i> ATCC 43255] <a href="#">ZP_05349371.1</a>                   | 4e-04 | 38%<br>24/64    | Helix turn helix proteins                                       |
| H476_0288 | 76   | Regulatory proteins       | Transcriptional regulator [ <i>Clostridium cellulolyticum</i> ] <a href="#">YP_002507585.1</a>                      | 1.2   | 29%<br>16/56    | Hypothetical protein                                            |
| H476_0289 | 1357 | Collagen adhesion protein | Collagen adhesin [ <i>Clostridium perfringens</i> str. 13] <a href="#">NP_150050.1</a>                              | 0.0   | 42%<br>553/1323 | CnaB type peptidase domain                                      |
| H476_0290 | 171  | Hypothetical protein      | Conserved hypothetical protein [ <i>Clostridium perfringens</i> E str. JGS1987] <a href="#">ZP_02633035.1</a>       | 9e-06 | 36%<br>48/133   | No putative conserved domain                                    |
| H476_0291 | 160  | Hypothetical protein      | No homology found                                                                                                   |       |                 | No putative conserved domain                                    |

|           |     |                                          |                                                                                                                              |        |     |                                                                                        |
|-----------|-----|------------------------------------------|------------------------------------------------------------------------------------------------------------------------------|--------|-----|----------------------------------------------------------------------------------------|
| H476_0292 | 216 | Hypothetical protein                     | No homology found                                                                                                            |        |     | No putative conserved domain                                                           |
| H476_0293 | 700 | Topoisomerase                            | DNA topoisomerase<br>[ <i>Clostridium difficile</i> QCD-76w55] <a href="#">ZP_05358121.1</a>                                 | 2e-105 | 34% | TOPRIM_TopoiA_TopoiI superfamily, TOP1Ac superfamily, DNA topoisomerase family protein |
| H476_0294 | 167 | Hypothetical protein                     | Hypothetical protein CLL_0015<br>[ <i>Clostridium botulinum</i> B str. Eklund 17B] <a href="#">YP_001893638.1</a>            | 6e-12  | 36% | No putative conserved domain                                                           |
| H476_0295 | 54  | Hypothetical protein                     | Hypothetical protein EFOG_03015<br>[ <i>Enterococcus faecalis</i> X98] <a href="#">ZP_05600032.1</a>                         | 0.059  | 48% | No putative conserved domain                                                           |
| H476_0296 | 76  | Putative membrane protein                | Conserved hypothetical protein<br>[ <i>Clostridium perfringens</i> D str. JGS1721] <a href="#">ZP_02952703.1</a>             | 2e-12  | 50% | No putative conserved domain                                                           |
| H476_0297 | 925 | Type IV secretory system conjugative DNA | Type IV secretory pathway, VirD4 component<br>[ <i>Clostridium perfringens</i> D str. JGS1721] <a href="#">ZP_02952628.1</a> | 0      | 47% | TraG-D_C superfamily, VirD4                                                            |
| H476_0298 | 682 | Putative membrane protein                | Putative membrane protein<br>[ <i>Clostridium perfringens</i> C str. JGS1495] <a href="#">ZP_02865646.1</a>                  | 2e-90  | 36% | No putative conserved domain                                                           |
| H476_0299 | 97  | Hypothetical protein                     | Conserved hypothetical protein<br>[ <i>Clostridium perfringens</i> B str. ATCC 3626] <a href="#">ZP_02635907.1</a>           | 1e-16  | 46% | No putative conserved domain                                                           |

|           |     |                                               |                                                                                                         |        |                |                                                                                         |
|-----------|-----|-----------------------------------------------|---------------------------------------------------------------------------------------------------------|--------|----------------|-----------------------------------------------------------------------------------------|
| H476_0300 | 201 | Hypothetical protein                          | Hypothetical protein<br>HA1_15800 [ <i>Clostridium perfringens</i> F262]<br><u>ZP_16922174.1</u>        | 6e-38  | 44%<br>88/201  | No putative conserved domain                                                            |
| H476_0301 | 59  | Hypothetical protein                          | Hypothetical protein<br>CdifA_02598 [ <i>Clostridium difficile</i> ATCC 43255]<br><u>ZP_05349623.1</u>  | 1e-04  | 58%<br>22/38   | No putative conserved domain                                                            |
| H476_0302 | 635 | Type IV secretion system coupling dna binding | Type IV secretion system VirB4 component [ <i>Bacillus thuringiensis</i> MC28]<br><u>YP_006815694.1</u> | 5e-141 | 45%<br>223/497 | Conjugal transfer ATP binding cassette domain of MRP, iron sulphur cluster transporters |
| H476_0303 | 54  | Hypothetical protein                          | Hypothetical protein<br>CdifA_02598 [ <i>Clostridium difficile</i> ATCC 43255]<br><u>ZP_17069585.1</u>  | 0.019  | 58%<br>19/33   | No putative conserved domain                                                            |
| H476_0304 | 225 | Hypothetical protein                          | No putative conserved domain                                                                            |        |                | No putative conserved domain                                                            |
| H476_0305 | 392 | Cell wall binding protein                     | Cell wall-binding protein [ <i>Clostridium perfringens</i> str. 13]<br><u>NP_150037.1</u>               | 6e-149 | 58%<br>225/387 | Lysozyme like superfamily, nlpC/P60 family protein                                      |
| H476_0306 | 125 | SS Dna binding protein                        | Single-strand binding protein [ <i>Clostridium difficile</i> QCD-63q42] <u>ZP_05332107.1</u>            | 1e-15  | 38%<br>41/107  | Single stranded DNA binding family protein                                              |
| H476_0307 | 300 | Hypothetical protein                          | Hypothetical protein PBCN14 [ <i>Clostridium perfringens</i> ]                                          | 1e-22  | 30%            | No putative conserved domain                                                            |

|           |     |                      |                                                                                                                                                      |        |                |                                                   |
|-----------|-----|----------------------|------------------------------------------------------------------------------------------------------------------------------------------------------|--------|----------------|---------------------------------------------------|
| H476_0307 | 300 | Hypothetical protein | Hypothetical protein PBCN14<br>[ <i>Clostridium perfringens</i> ]<br><u>YP_209672.1</u>                                                              | 1e-22  | 30%<br>85/279  | No putative conserved domain                      |
| H476_0308 | 77  | Hypothetical protein | No homology found                                                                                                                                    |        |                | No putative conserved domain                      |
| H476_0309 | 89  | CopG family protein  | Toxin-antitoxin system,<br>antitoxin component, ribbon-<br>helix-helix domain protein<br>[ <i>Enterococcus faecium</i> R497]<br><u>ZP_18306856.1</u> | 5e-06  | 38%<br>28/74   | No putative conserved domain                      |
| H476_0310 | 142 | Hypothetical protein | Peptidoglycan GlcNAc<br>deacetylase [ <i>Streptococcus</i><br><i>pneumoniae</i> TIGR4]<br><u>ZP_22472958.1</u>                                       | 7.2    | 27%<br>29/106  | No putative conserved domain                      |
| H476_0311 | 386 | Hypothetical protein | putative conjugative relaxase<br>[ <i>Lactococcus garvieae</i> ]<br><u>YP_005352364.1</u>                                                            | 2e-63  | 32%<br>133/420 | TraI, conjugal transfer relaxase                  |
| H476_0312 | 80  | Hypothetical protein | No homology found                                                                                                                                    |        |                | No putative conserved domain                      |
| H476_0313 | 607 | Hypothetical protein | LtrC-like protein [ <i>Bacillus</i><br><i>thuringiensis</i> MC28]<br><u>YP_006815671.1</u>                                                           | 2e-102 | 50%            | Domain of undefined function (DUF)955 superfamily |
| H476_0314 | 60  | Hypothetical protein | No homology found                                                                                                                                    |        |                | No putative conserved domain                      |
| H476_0315 | 95  | Hypothetical protein | Hypothetical protein Clole_3081<br>[ <i>Clostridium lentocellum</i> DSM                                                                              | 2e-15  | 44%            | No putative conserved domain                      |

|           |     |                          |                                                                                                                |        |                |                                 |
|-----------|-----|--------------------------|----------------------------------------------------------------------------------------------------------------|--------|----------------|---------------------------------|
| H476_0316 | 259 | Hypothetical protein     | Hypothetical protein<br>Clocel_0429 [ <i>Clostridium<br/>cellulovorans</i> 743B]<br><u>YP_003841970.1</u>      | 3e-13  | 50%<br>37/74   | No putative conserved<br>domain |
| H476_0317 | 54  | Hypothetical protein     |                                                                                                                |        |                | No putative conserved<br>domain |
| H476_0318 | 187 | Resolvase                | Resolvase domain-containing<br>protein [ <i>Clostridium difficile</i><br>QCD-66c26] <u>ZP_05273846.1</u>       | 4e-90  | 72%<br>128/179 | Ser_Recombinase<br>superfamily  |
| H476_0319 | 187 | TraB family protein      | TraB family protein [ <i>Vibrio<br/>cholerae</i> HE-40] <u>ZP_17735271.1</u>                                   | 1e-04  | 25%<br>38/152  | No putative conserved<br>domain |
| H476_0320 | 109 | YcxB like family protein | Primase-like protein<br>[ <i>Staphylococcus aureus</i> ]<br><u>ADN53668.1</u>                                  | 3.1    | 29%<br>23/80   | No putative conserved<br>domain |
| H476_0321 | 418 | Transposase,             | transposase, IS605 OrfB family<br>[ <i>Clostridium difficile</i> 70-100-<br>2010] <u>ZP_17077481.1</u>         | 6e-116 | 45%<br>189/419 | IS605 OrfB family               |
| H476_0322 | 119 | Hypothetical protein     | Permease [ <i>Lactobacillus reuteri</i><br>CF48-3A] <u>ZP_03975395.1</u>                                       | 8.6    | 32%<br>13/61   | No putative conserved<br>domain |
| H476_0323 | 204 | Hypothetical protein     | Hypothetical protein<br>HMPREF9469_00031<br>[ <i>Clostridium citroniae</i> WAL-<br>17108] <u>ZP_09056994.1</u> | 1e-34  | 38%<br>78/203  | DUF3267 superfamily             |
| H476_0324 | 77  | Hypothetical protein     | Hypothetical protein<br>CdifQCD_20341 [ <i>Clostridium</i>                                                     | 4e-13  | 65%            | No putative conserved           |



|           |    |                              |                                                                                                         |       |              |                                     |
|-----------|----|------------------------------|---------------------------------------------------------------------------------------------------------|-------|--------------|-------------------------------------|
| H476_0324 | 77 | Hypothetical protein         | Hypothetical protein<br>CdifQCD_20341 [ <i>Clostridium difficile</i> QCD-37x79]<br><u>ZP_05399445.1</u> | 4e-13 | 65%<br>31/48 | No putative conserved domain        |
| H476_0325 | 46 | Peptidase M28 family protein | Putative aminopeptidase<br>[ <i>Clostridium</i> sp. JC122]<br><u>ZP_10929384.1</u>                      | 2e-05 | 65%<br>24/37 | Zinc peptidase like superfamily M28 |
| H476_0326 | 42 | Peptidase M28 family protein | Putative aminopeptidase<br>[ <i>Clostridium</i> sp. JC122]                                              | .001  | 54%          | Zinc peptidase like superfamily M28 |
